# Supplementary material
Source: PubMed Central journal article supplement (PMC3082507)
Supplement: NIHMS285796-supplement-Table_S1.pdf [file NIHMS285796-supplement-Table_S1.pdf]

| Gene     | Average Act               |           |           |                           |            |           |
|----------|---------------------------|-----------|-----------|---------------------------|------------|-----------|
|          | Hpv16/FcRy <sup>-/-</sup> |           |           | Hpv16/FcRy <sup>+/-</sup> |            |           |
|          | DCs                       | IMCs      | M0s       | DCs                       | IMCs       | M0s       |
| I8S      | -11.03274                 | -10.235   | -10.30407 | -10.96193                 | -10.34468  | -11.55206 |
| Actb     | -1.916183                 | -1.153463 | -1.061196 | -1.903177                 | -1.209966  | -1.199671 |
| Argtr2   | 5.4628427                 | 5.7691348 | 5.2084887 | ND                        | ND         | 12.923375 |
| Arg      | 3.6580527                 | 6.5403927 | 6.1943632 | 5.3149438                 | 6.3352095  | 4.9406456 |
| B2m      | 0                         | 0         | 0         | 0                         | 0          | 0         |
| Bax      | 5.3750753                 | 6.4732933 | 7.0618545 | 5.4680575                 | 6.6709238  | 5.460777  |
| Bcl2     | 8.1541987                 | 9.1829703 | 10.21576  | 8.2508985                 | 10.088019  | 8.0496033 |
| Bcl2l1   | 5.0227333                 | 4.6581037 | 5.0081357 | 5.6032219                 | 3.5069021  | 5.303846  |
| C3       | 9.5140882                 | 9.2002898 | 10.403962 | 10.91466                  | 10.720982  | 7.3446556 |
| Ccl17    | 8.6978823                 | 13.528491 | 13.935225 | 4.1380616                 | 11.72627   | 11.46767  |
| Ccl19    | 11.179145                 | 11.074764 | 9.729543  | 11.805415                 | 10.658432  | 9.7116386 |
| Ccl2     | 5.8383768                 | 5.972188  | 8.601267  | 7.1172746                 | 7.555771   | 7.449809  |
| Ccl22    | 12.991614                 | ND        | ND        | 6.432336                  | 12.948345  | 12.855514 |
| Ccl3     | 7.0110432                 | 5.9638093 | 5.925582  | 8.503873                  | 3.3418106  | 6.7191109 |
| Ccl5     | 5.6644253                 | 9.0652088 | 8.5786203 | 6.6702080                 | 9.8836459  | 7.4774091 |
| Car2     | 3.1788788                 | 4.7297415 | 4.6328525 | 3.1941115                 | 5.9717714  | 3.0730938 |
| Car4     | 11.250447                 | 11.740519 | 11.653931 | 11.4504006                | 11.882542  | 9.7191014 |
| Car7     | 3.9707137                 | 7.2751535 | 9.5221218 | 3.704344                  | 8.5867159  | 7.2286125 |
| Cd163    | 4.266869                  | 2.759261  | 5.174970  | 4.6124951                 | 5.9940665  | 1.8956804 |
| Cd19     | 9.3096485                 | 13.161437 | 12.549119 | ND                        | 11.248174  | 12.398548 |
| Cd206    | 4.7237358                 | 4.0423652 | 2.717171  | 4.3950741                 | 3.6717348  | 3.0484501 |
| Cd28     | 9.5140882                 | 9.2002898 | 10.403962 | 10.91466                  | 10.720982  | 7.3446556 |
| Cd34     | 8.4656662                 | 7.947458  | 9.2663755 | 8.9901473                 | 8.774726   | 7.4001499 |
| Cd38     | 6.4294755                 | 8.1965567 | 9.2965527 | 8.6075218                 | 9.6624342  | 8.3948696 |
| Cd3e     | 8.125514                  | 9.2075215 | 10.636615 | 9.1179953                 | 9.1679285  | 6.8432391 |
| Cd4      | 6.4632652                 | 7.0054622 | 9.1180242 | 6.8988253                 | 8.0119573  | 5.1963438 |
| Cd40     | 6.6826192                 | 9.3440495 | 10.920526 | 6.1080425                 | 11.428185  | 8.8542323 |
| Cd40lg   | 12.074109                 | 13.669503 | 14.240525 | 12.342643                 | 13.08031   | 10.873878 |
| Cd68     | 2.5125127                 | 3.2317123 | 3.400821  | 2.5447051                 | 3.4448525  | 2.2830356 |
| Cd80     | 5.3771747                 | 5.8813203 | 5.7430998 | 5.5768619                 | 6.52429948 | 5.9018895 |
| Cd86     | 4.471942                  | 5.3156018 | 5.88597   | 4.0573285                 | 6.2543296  | 5.4061919 |
| Cd8a     | 8.6353413                 | 9.6655618 | 11.054067 | 8.119134                  | 10.437153  | 8.9705304 |
| Cd44s    | 12.12854                  | 13.326013 | 14.338834 | 13.945125                 | 11.786607  | 13.663338 |
| Ccl1     | 13.128085                 | 12.975059 | 15.152088 | 12.967968                 | 13.161615  | 23.882335 |
| Ccl2     | 5.93235                   | 4.790235  | 5.220322  | 6.2789021                 | 2.2918216  | 5.273825  |
| Car2     | 11.06035                  | 12.083472 | 12.224661 | 13.614855                 | 10.788954  | 9.4586    |
| Csf3     | 7.8495792                 | 8.7415627 | 6.202535  | 11.65942                  | 5.7255023  | 10.422356 |
| Ctl4a    | 7.0017922                 | 8.1190672 | 9.5918615 | 8.0961948                 | 8.5996306  | 8.393992  |
| Cxcl10   | 5.7919168                 | 3.8155223 | 3.8939845 | 6.9330099                 | 4.6070766  | 6.389242  |
| Cxcl11   | 6.3928718                 | 6.2319195 | 5.5976143 | 8.4458348                 | 7.6158609  | 8.5971723 |
| Cxcr3    | 7.5532165                 | 7.1255358 | 9.5101383 | 8.3771025                 | 8.862021   | 7.0013713 |
| Cyp1a2   | ND                        | ND        | ND        | ND                        | ND         | ND        |
| Cyp7a1   | ND                        | 7.448001  | 16.423032 | ND                        | 14.669026  | ND        |
| Ece1     | 9.3958755                 | 10.871572 | 12.179686 | 10.393423                 | 13.090465  | 11.216722 |
| Efn1     | 5.2461093                 | 7.8904135 | 7.370064  | 8.1616236                 | 8.8575509  | 8.4800795 |
| Fas      | 8.1177457                 | 7.4193353 | 7.6522962 | 8.4377166                 | 5.8002635  | 7.8922964 |
| Fasf     | 11.546357                 | 10.944307 | 10.478402 | 12.632322                 | 9.3717566  | 10.884141 |
| Fn1      | 0.1352288                 | 2.5719927 | 4.276288  | 0.7286984                 | 4.0940608  | 1.8690278 |
| Gapdh    | -0.165271                 | 0.2572417 | 0.1246723 | 0.5379321                 | 0.3347789  | 0.5596933 |
| Gapdh-vc | 0.2864418                 | 0.347611  | 0.4701852 | 0.6003111                 | 0.4348861  | 1.1503680 |
| Gusb     | 3.6270157                 | 4.4775942 | 6.1805805 | 3.3283223                 | 6.2303356  | 3.672469  |
| Gzmb     | 8.5529743                 | 10.330535 | 10.697164 | 10.346652                 | 10.751927  | 7.589718  |
| H2-Ea    | 15.319059                 | 17.341332 | ND        | 5.8991668                 | 9.6714556  | 6.8263838 |
| H2-Eb1   | -0.994025                 | 0.984631  | 3.4210285 | -0.556564                 | 4.4160199  | 0.6864184 |
| Hmox1    | 3.639265                  | 4.2214207 | 3.7977985 | 4.082534                  | 2.62004    | 2.8920171 |
| Hprt1    | 5.4180857                 | 5.9806673 | 6.2585367 | 5.4695775                 | 6.8410363  | 5.3261078 |
| Icos     | 7.145556                  | 8.3823805 | 9.6127815 | 8.27531                   | 8.6060936  | 6.0976129 |
| Irfng    | 11.82044                  | 12.146793 | 11.614992 | 13.438352                 | 11.873713  | 10.918663 |
| Ikbkb    | 5.3651367                 | 6.5282868 | 7.0578763 | 5.137755                  | 7.0910179  | 5.8282169 |
| Irf1     | 7.9062665                 | 8.5526108 | 8.653982  | 8.5784023                 | 9.2270855  | 6.794883  |
| Ill2a    | 8.2750393                 | 8.2712868 | 8.3772257 | 10.960523                 | 6.5306651  | 10.806014 |
| Ill2b    | 7.5353535                 | 10.638799 | 11.236193 | 10.089126                 | 11.207832  | 11.134906 |
| Ill3     | 10.406021                 | 10.271214 | 11.762831 | 11.056665                 | 10.358055  | 7.6518425 |
| Ill5     | 8.4061115                 | 7.2095842 | 7.5718383 | 8.6345694                 | 5.4573668  | 7.9041551 |
| Ill7     | 9.1295318                 | 10.431532 | 11.991584 | 12.190067                 | 10.012663  | 9.9212639 |
| Ill8     | 7.885878                  | 7.8741995 | 7.710999  | 7.7643273                 | 7.7694716  | 7.6763674 |
| Ill1a    | 4.6295553                 | 5.28856   | 4.0104387 | 8.5417721                 | 2.4862873  | 7.791205  |
| Ill1b    | 1.390803                  | 0.0345533 | 0.7200142 | 1.2870425                 | -2.173183  | 2.5794444 |
| Ill12    | 13.758712                 | 13.94788  | 13.707912 | 14.691703                 | 13.040575  | 13.13546  |
| Ill2ra   | 6.2913568                 | 8.2342688 | 9.6623737 | 7.1389085                 | 8.4069383  | 6.1783678 |
| Ill3     | 12.902174                 | ND        | ND        | ND                        | 15.204908  | ND        |
| Ill4     | 10.587979                 | 13.696543 | 11.811269 | 12.15951                  | 11.715053  | 9.235783  |
| Ill5     | 13.567701                 | 13.393965 | 15.692628 | 14.547999                 | 12.051676  | 12.104431 |
| Ill6     | 5.8279685                 | 8.038566  | 8.8263652 | 7.5068874                 | 8.8803006  | 5.5422358 |
| Ill7     | 11.587282                 | 12.706352 | 13.659669 | 12.684278                 | 11.939679  | 12.51932  |
| Ill9     | 11.599365                 | ND        | ND        | ND                        | 11.348053  | ND        |
| Irf7     | 4.8795085                 | 4.9219643 | 4.8383068 | 5.2245713                 | 4.9955148  | 5.6218384 |
| Lrp2     | ND                        | ND        | ND        | ND                        | 12.965551  | 14.208985 |
| Lta      | ND                        | ND        | ND        | ND                        | ND         | ND        |
| NfkB1    | 4.2832108                 | 5.0962687 | 4.8983413 | 4.2769399                 | 4.403972   | 4.5376171 |
| NfkB2    | 4.4932068                 | 4.80416   | 4.906491  | 4.6023051                 | 3.6753001  | 4.756822  |
| Nos2     | 3.1555448                 | 6.8913718 | 4.796189  | 6.4918535                 | 6.908151   | 7.6831749 |
| Oas1a    | 6.9382788                 | 7.0865878 | 6.8163143 | 8.911239                  | 7.718457   | 3.6553335 |
| Pgk1     | 4.4667777                 | 5.821335  | 6.0696747 | 5.0429126                 | 5.9432898  | 6.4913949 |
| Pgk1     | 3.2574837                 | 4.2753497 | 4.2970542 | 3.507954                  | 3.8242081  | 4.4285809 |
| Prf1     | 10.916667                 | 12.404514 | 11.155428 | 13.730083                 | 11.935779  | 9.615196  |
| Ptgs2    | 4.5630192                 | 4.6221883 | 4.2787592 | 7.2691298                 | 2.055408   | 6.4231221 |
| Ptprc    | 2.3591157                 | 2.3775465 | 2.228155  | 2.6473533                 | 1.4806326  | 2.703080  |
| Sele     | 8.2778107                 | 6.8513915 | 7.6861395 | 8.354572                  | 6.3572898  | 6.8169538 |
| Selp     | 8.459775                  | 6.9416025 | 7.0082395 | 8.7580648                 | 6.4755505  | 7.7844994 |
| Skil     | 4.4164402                 | 5.0583692 | 5.1580298 | 4.4651595                 | 4.351696   | 3.7175329 |
| Smad3    | 7.143099                  | 7.2956473 | 7.2131198 | 8.3006866                 | 6.6550164  | 6.6623958 |
| Smad7    | 6.185281                  | 6.3303163 | 7.207216  | 5.5560418                 | 5.47529    | 6.1433693 |
| Socs1    | 5.5114907                 | 5.1864152 | 4.8586928 | 6.494325                  | 4.9156659  | 6.0721531 |
| Socs2    | 5.087384                  | 5.394255  | 5.50309   | 5.7908356                 | 6.465382   | 6.7542705 |
| Stat1    | 4.2728975                 | 4.9520283 | 4.7681665 | 5.0442398                 | 4.8096278  | 5.0677174 |
| Stat3    | 2.2529602                 | 2.432132  | 2.5088253 | 2.221056                  | 1.65076    | 2.6411319 |
| Stat4    | 6.4187105                 | 7.4102153 | 7.8724283 | 6.1033945                 | 6.8591029  | 6.3232475 |
| Stat6    | -1.589185                 | -1.15579  | ND        | 4.836095                  | 4.122296   | 4.6173    |
| Tbx21    | 10.095185                 | 10.582132 | 10.582102 | 11.471935                 | 11.209392  | 10.349222 |
| Tfr2     | 5.4769863                 | 5.5080468 | 6.3408525 | 5.1270704                 | 5.782254   | 5.5975621 |
| Tgfb1    | 2.6864278                 | 3.5762153 | 3.8765527 | 2.8440039                 | 3.2423371  | 2.8419983 |
| Tnf      | 3.4880662                 | 3.451342  | 3.1036268 | 4.3925109                 | 1.148435   | 4.2543516 |
| Tnfrsf18 | 7.0098495                 | 8.1669512 | 8.5898178 | 7.57707                   | 8.337105   | 7.2181005 |
| Vcam1    | 7.5245302                 | 8.0977482 | 9.5362763 | 7.480947                  | 8.6555389  | 7.4275538 |
| Vegfa    | 4.5784692                 | 5.572447  | 5.3000888 | 5.5216044                 | 4.2340428  | 5.6376685 |
| Ym1      | 4.073182                  | 6.166255  | 5.8606978 | 4.403946                  | 9.0707085  | 3.7237824 |

| Gene    | St Dev (Act)              |           |           |                           |           |           |
|---------|---------------------------|-----------|-----------|---------------------------|-----------|-----------|
|         | Hpv16/FcRy <sup>-/-</sup> |           |           | Hpv16/FcRy <sup>+/-</sup> |           |           |
|         | DCs                       | IMCs      | M0s       | DCs                       | IMCs      | M0s       |
| I8S     | 0.3901201                 | 0.3936255 | 0.6578827 | 0.2704783                 | 0.3144466 | 0.7193085 |
| Actb    | 0.3969024                 | 0.7716481 | 0.2491394 | 0.3810171                 | 0.1049266 | 0.4556643 |
| Argtr2  | ND                        | 0.9218714 | ND        | ND                        | ND        | 1.0760978 |
| Arg     | 1.1903783                 | 0.1088393 | 5.7423631 | 0.5930998                 | 2.2227353 | 0.275199  |
| B2m     | 0                         | 0         | 0         | 0                         | 0         | 0         |
| Bax     | 0.2590518                 | 0.9691811 | 2.1403556 | 0.2020271                 | 0.4921301 | 0.5388653 |
| Bcl2    | 0.606985                  | 1.2814217 | 2.8232201 | 0.6059737                 | 1.1651225 | 0.9689549 |
| Bcl2l1  | 0.2652215                 | 1.0912849 | 1.2222112 | 0.2413719                 | 0.2135654 | 0.5714918 |
| C3      | 0.2361982                 | 0.4419855 | 0.1615893 | 0.3064892                 | 0.1156887 | 0.6536433 |
| Ccl17   | 0.5330394                 | 2.2567154 | 0.2815936 | 1.1584454                 | 3.4655416 | 1.2703223 |
| Ccl19   | 0.4916957                 | 1.2190345 | 0.0547725 | 0.8547153                 | 1.7120701 | 1.2007004 |
| Ccl2    | 0.191332                  | 0.6630414 | 3.5869379 | 0.3622259                 | 2.5077044 | 0.2049453 |
| Ccl22</ |                           |           |           |                           |           |           |
